# Supplementary material for: Identification of Antibiotics in Surface-Groundwater. A Tool towards the Ecopharmacovigilance Approach: A Portuguese Case-Study
Source: MDPI journal article supplement (doi:10.3390/antibiotics10080888), 2021-07-21
Supplement: s1 [file s1]

Table S4. Detection of frequency and geographic distribution of pharmaceuticals in groundwater (2017\_2018\_2019).

1

|                                           |                                  | 2017                    |                 |        | 2018        |            | 2019         |          |                                             |                                                                             |
|-------------------------------------------|----------------------------------|-------------------------|-----------------|--------|-------------|------------|--------------|----------|---------------------------------------------|-----------------------------------------------------------------------------|
|                                           |                                  | March<br>April          |                 |        | May<br>June |            | April<br>May |          |                                             |                                                                             |
| Station Nr.                               |                                  | 1                       | 2               | 3      | 4           | 5          | 6            | 7        |                                             |                                                                             |
| Pharmacoterapeutical Group                |                                  | Active Substances       |                 |        |             |            |              |          | Frequency (n=7)<br>(d/n)×100 % <sup>1</sup> |                                                                             |
| Antibiotics                               | Quinolones                       | Ciprofloxacin           | X               | X      |             | X          |              |          | 43                                          |                                                                             |
|                                           |                                  | Enrofloxacin            |                 | X      |             | X          |              |          | 29                                          |                                                                             |
|                                           |                                  | Norfloxacin             |                 |        |             | X          |              | X        | 29                                          |                                                                             |
|                                           | Trimethoprim                     | Trimethoprim            |                 | X      |             | X          |              |          | 29                                          |                                                                             |
|                                           | Tetracyclines                    | Tetracycline            |                 |        |             | X          |              |          | 14                                          |                                                                             |
|                                           | Lincosamides                     | Lincomycin              |                 |        |             | X          |              | X        | 29                                          |                                                                             |
|                                           | <u>Beta-lactamase inhibitors</u> |                         | Clavulanic acid |        | X           |            |              |          |                                             | 14                                                                          |
| <u>Renal Dehydropeptidase-I inhibitor</u> |                                  | Cilastatin              |                 | X      |             |            |              |          | 14                                          |                                                                             |
| Antiviral                                 |                                  | Abacavir                |                 |        | X           |            |              |          | 14                                          |                                                                             |
|                                           |                                  | Geographic distribution | 1               | 5      | 1           | 2          | 4            | 1        | 1                                           | Σ 15 detected active substances                                             |
|                                           |                                  | Region                  | North           | Centre | Centre      | West /Tejo | West /Tejo   | Alentejo | Alentejo                                    | West/Tejo: 6 – 43%<br>Centre: 6 – 43%<br>Alentejo: 2 – 14%<br>North: 1 – 7% |

<sup>1</sup>Frequency = (d/n)x100, where *d*=number of detections and *n*=number of stations.
