# Supplementary material for: Identification of Antibiotics in Surface-Groundwater. A Tool towards the Ecopharmacovigilance Approach: A Portuguese Case-Study
Source: MDPI journal article supplement (doi:10.3390/antibiotics10080888), 2021-07-21
Supplement: s1 [file s1]

**Table S2.** Groundwater: characterization of the sampling stations.

| <b>Regions</b>       | <b>River basin district (RH)</b> | <b>Sampling station</b> | <b>station code /<u>geographic coordinates</u></b> | <b>Localisation (well)</b>   | <b>Potential Pressures</b>                |
|----------------------|----------------------------------|-------------------------|----------------------------------------------------|------------------------------|-------------------------------------------|
| North                | RH2                              | 1                       | 68/12<br>41.490;<br>-8.744                         | Esposende                    | Agriculture<br>Animal production          |
| Center               | RH4A                             | 2                       | 163/125<br>40.767;<br>-8.599                       | Murtosa                      | Urban<br>Agriculture<br>Animal production |
|                      |                                  | 3                       | -<br>39.808;<br>-8.751                             | Martos                       | Agriculture<br>Animal production          |
| West and Tejo Region | RH5A                             | 4                       | 405/17<br>38.939;<br>-8.863                        | Samora Correia               | Agriculture<br>Animal production          |
|                      |                                  | 5                       | 377/94<br>39.073;<br>-8.728                        | Salvaterra de Magos          | Agriculture<br>Animal production          |
| Alentejo             | RH6/HR7                          | 6                       | -<br>38.052;<br>-8.399                             | Monte da Horta /Vale da Eira | Agriculture<br>Animal production          |
|                      |                                  | 7                       | -<br>37.996;<br>-8.607                             | São Bartolomeu da Serra      | Agriculture<br>Animal production          |
