# Supplementary material for: Identification of Antibiotics in Surface-Groundwater. A Tool towards the Ecopharmacovigilance Approach: A Portuguese Case-Study
Source: MDPI journal article supplement (doi:10.3390/antibiotics10080888), 2021-07-21
Supplement: s1 [file s1]

**Table S3.** Frequency detection and geographic distribution of pharmaceuticals in surface water (2017\_2018\_2019).

|                                  |               | Period                     |  | 2017      |             |        |              |         | 2018        |       |                |         | 2019         |        |        |            |                                                                                              |
|----------------------------------|---------------|----------------------------|--|-----------|-------------|--------|--------------|---------|-------------|-------|----------------|---------|--------------|--------|--------|------------|----------------------------------------------------------------------------------------------|
|                                  |               | March<br>April             |  |           | May<br>June |        | April<br>May |         | May<br>June |       | Sep<br>October |         | April<br>May |        | July   |            |                                                                                              |
|                                  |               | Water bodies               |  |           | Tejo        | Tejo   | Vouga        | Caia    | Ria Formosa | Ave   | Ave            | Arade   | Ria Formosa  | Tejo   | Tâmega | Rio Tinto  | S.Domingos                                                                                   |
|                                  |               | Station Nr.<br>(n=13)      |  |           | 8           | 7      | 5            | 10      | 12          | 1     | 2              | 13      | 11           | 9      | 3      | 4          | 6                                                                                            |
| Pharmacoterapeutical Group       |               | Active Substance           |  |           |             |        |              |         |             |       |                |         |              |        |        |            | Frequency<br>(d/n)x100 % <sup>1</sup>                                                        |
| Antibiotics                      | Penicillins   | Amoxicillin                |  |           |             |        | X            |         |             |       |                |         |              |        |        | X          | 15                                                                                           |
|                                  | Quinolones    | Enrofloxacin               |  |           |             |        |              | X       | X           | X     |                |         | X            |        |        |            | 31                                                                                           |
|                                  |               | Ciprofloxacin              |  |           |             |        | X            | X       | X           | X     |                | X       | X            |        |        |            | 46                                                                                           |
|                                  |               | Norfloxacin                |  |           |             |        |              |         |             |       | X              |         |              |        |        |            | 8                                                                                            |
|                                  | Sulphonamides | Sulfamethoxazole           |  |           |             |        | X            |         |             | X     |                |         |              |        |        | X          | 23                                                                                           |
|                                  |               | Sulfamethazine             |  |           |             |        |              |         |             |       |                |         |              |        |        | X          | 8                                                                                            |
|                                  | Macrolides    | Erythromycin               |  |           |             |        |              | X       |             | X     | X              |         |              |        | X      | X          | 38                                                                                           |
|                                  |               | Azithromycin               |  |           |             |        |              |         | X           |       |                |         |              |        |        |            | 8                                                                                            |
|                                  |               | Clarithromycin             |  |           |             |        |              |         | X           | X     | X              |         | X            |        | X      | X          | 46                                                                                           |
|                                  | Trimethoprim  | Trimethoprim               |  |           |             |        |              |         |             |       |                | X       |              | X      |        |            | 15                                                                                           |
|                                  | Tetracyclines | Tetracycline               |  |           |             |        | X            |         |             | X     |                |         | X            |        |        | X          | 31                                                                                           |
|                                  | Lincosamides  | Lincomycin                 |  |           |             |        |              |         |             |       |                | X       | X            |        |        |            | 15                                                                                           |
| <u>Beta-lactamase inhibitors</u> |               | Clavulanic acid            |  |           |             |        | X            |         |             |       |                |         |              |        | X      | 15         |                                                                                              |
|                                  |               | Tazobactam                 |  |           |             |        |              |         |             | X     |                | X       |              |        |        | 15         |                                                                                              |
| Antiviral                        |               | Abacavir                   |  |           |             |        | X            | X       | X           | X     | X              | X       | X            | X      | X      | X          | 69                                                                                           |
|                                  |               | Geographic<br>distribution |  | 0         | 0           | 5      | 5            | 5       | 7           | 5     | 4              | 7       | 2            | 2      | 7      | 1          | Σ 50 detected<br>ative substances                                                            |
|                                  |               | Region                     |  | West/Tejo | West/Tejo   | Centre | Alentejo     | Algarve | North       | North | Algarve        | Algarve | West/Tejo    | Center | North  | West/ Tejo | North:19 – 38%<br>Algarve:16 – 32%<br>Centre:7 – 14%<br>Alentejo:5 – 10%<br>West/Tejo:3 – 6% |

<sup>1</sup>Frequency=( $d/n$ ) $\times$ 100, where  $d$ =number of detections and  $n$ =number of stations.
