# Supplementary material for: Identification of Antibiotics in Surface-Groundwater. A Tool towards the Ecopharmacovigilance Approach: A Portuguese Case-Study
Source: MDPI journal article supplement (doi:10.3390/antibiotics10080888), 2021-07-21
Supplement: s1 [file s1]

**Table S1.** Surface-water: characterization of the sampling stations.

| Regions              | River basin district (HR) | Water bodies                   | Sampling station | station code /geographic coordinates                       | Localisation                                                                    | WWTP <sup>1</sup> equivalent inhabitants      | Potential Pressures                   |
|----------------------|---------------------------|--------------------------------|------------------|------------------------------------------------------------|---------------------------------------------------------------------------------|-----------------------------------------------|---------------------------------------|
| North                | HR2                       | Ave river                      | 1                | PT05G/06<br>Lat. (°N): 41,49565<br>Long (°W): -8,3212      | Downstream of Prazins                                                           | -                                             | Agriculture / Animal production       |
|                      |                           |                                | 2                | PT05G/53<br>Lat. (°N): 41,40951<br>Long (°W): -8,38342     | Downstream of UWWTP (Guimarães) Serzedelo I and II.                             | Serzedelo I: 126.000<br>Serzedelo II: 270.822 | Urban Agriculture / Animal production |
|                      | HR3                       | Tâmega (international river)   | 3                | Chaves<br>Lat. (°N): 41,713199<br>Long (°W): -7,507799     | Downstream of UWWTP (Chaves). A tributary (sub-basin) of Douro river            | Chaves: 57.748                                | Urban Agriculture / Animal production |
|                      |                           | Tinto river                    | 4                | PT07F/05<br>Lat. (°N): 41,1539428<br>Long (°W): -8,5702716 | Rio Tinto- Campanhã Downstream of UWWTP. A tributary (sub-basin) of Douro river | Freixo: 170.000                               | Urban                                 |
| Center               | HR4A                      | Vouga river                    | 5                | PT09F/29<br>Lat. (°N): 40,672777<br>Long (°W): -8,560407   | Downstream of Angeja                                                            | -                                             | Agriculture / Animal production       |
| West and Tejo Region | HR5A                      | S. Domingos (west - reservoir) | 6                | PT18B/01<br>Lat. (°N): 39,33406<br>Long (°W): -9,31713     | S. Domingos reservoir                                                           | -                                             | Agriculture / Animal production       |
|                      |                           | Tejo (international river)     | 7                | PT16L/05<br>Lat. (°N): 39,660322<br>Long (°W): -7,569093   | Perais, near the border Portugal /Spain                                         | -                                             | Rural                                 |
|                      |                           |                                | 8                | PT16K/11<br>Lat. (°N): 39,5474596<br>Long (°W): -7,7934542 | Fratel reservoir                                                                | -                                             | Rural                                 |
|                      |                           |                                | 9                | PT21B/22<br>Lat. (°N): 38,69522<br>Long (°W):              | Marina Algés, transitional water,                                               | Beirolas: 213.500<br>Chelas: 255.000          | Urban, Agriculture                    |

|          |          |                             |    |                                                         |                                                     |                           |                                            |
|----------|----------|-----------------------------|----|---------------------------------------------------------|-----------------------------------------------------|---------------------------|--------------------------------------------|
|          |          |                             |    | -9,234269                                               | downstream of 3 UWWTP:                              | Alcântara: 756.000        |                                            |
| Alentejo | HR6 /HR7 | Caia river                  | 10 | PT20O/04<br>Lat. (°N): 38,8831<br>Long (°W): -7,0356    | Herdade da Comenda, near the border Portugal /Spain | -                         | Agriculture / Animal production            |
| Algarve  | HR8      | Ria Formosa (Coastal water) | 11 | PT31J/02<br>Lat. (°N): 37,00194<br>Long (°W): -7,92199  | Ria Formosa -Faro, Downstream of UWWTP              | - Faro / Northwest 44.530 | Urban                                      |
|          |          |                             | 12 | PT31J/20<br>Lat. (°N): 37,01814<br>Long (°W): -7,84396  | Ria Formosa - Olhão Downstream of UWWTP             | Faro / Olhão: 113.200     | Urban<br>Fish stocking<br>Fishing activity |
|          |          | Arade (Transitional water)  | 13 | PT31F/01S<br>Lat. (°N): 37,14425<br>Long (°W): -8,51528 | Portimão - UWWTP                                    | Portimão: 140.000         | Urban                                      |

<sup>1</sup>Waste Water Treatment Plants
